# Supplementary material for: Investigating the role of mixed-cation ionic liquid electrolytes in sodium battery efficiency and stability
Source: Royal Society of Chemistry journal article supplement (doi:10.1039/d4ma00533c), 2024-01-01
Supplement: d4ma00533c1.pdf [file d4ma00533c1.pdf]

## Supplementary

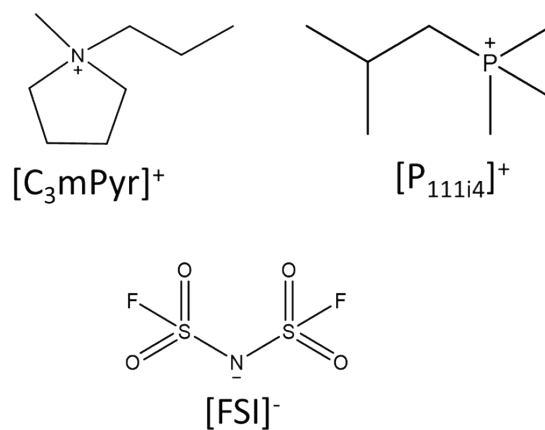

**Figure S1.** Structures of the ionic liquid

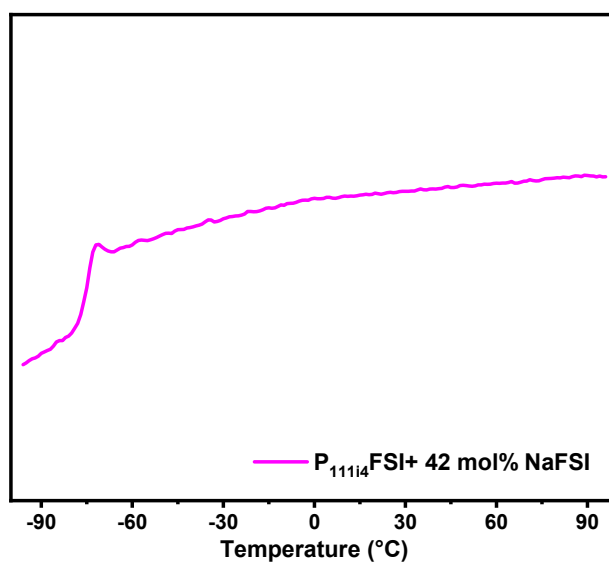

**Figure S2.** DSC heating trace of the  $P_{111i4}FSI + 42 \text{ mol\% NaFSI}$  from -90 °C to 90 °C

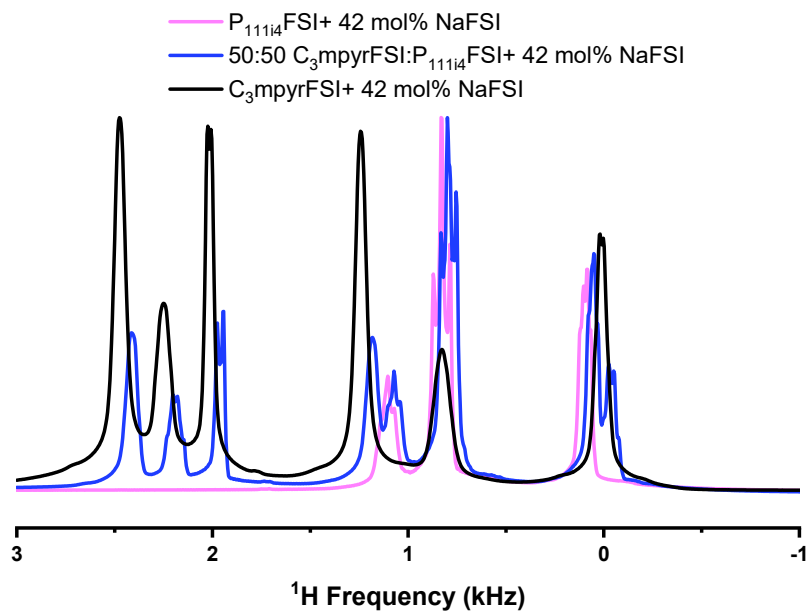

**Figure S3.**  $^1\text{H}$  spectra for the mixed  $\text{P}_{111i4}\text{FSI}$  and  $\text{C}_3\text{mpyrFSI}$  with 42mol% NaFSI system

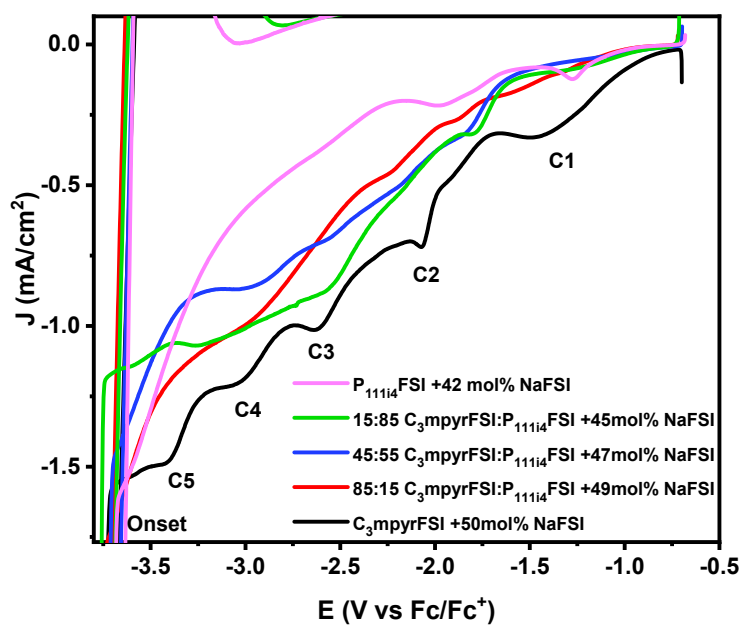

**Figure S4.** The enlarged reduction process of the cyclic voltammetry curves for the mixed  $\text{P}_{111i4}\text{FSI}$  and  $\text{C}_3\text{mpyrFSI}$  with saturated NaFSI system at 1<sup>st</sup> cycle

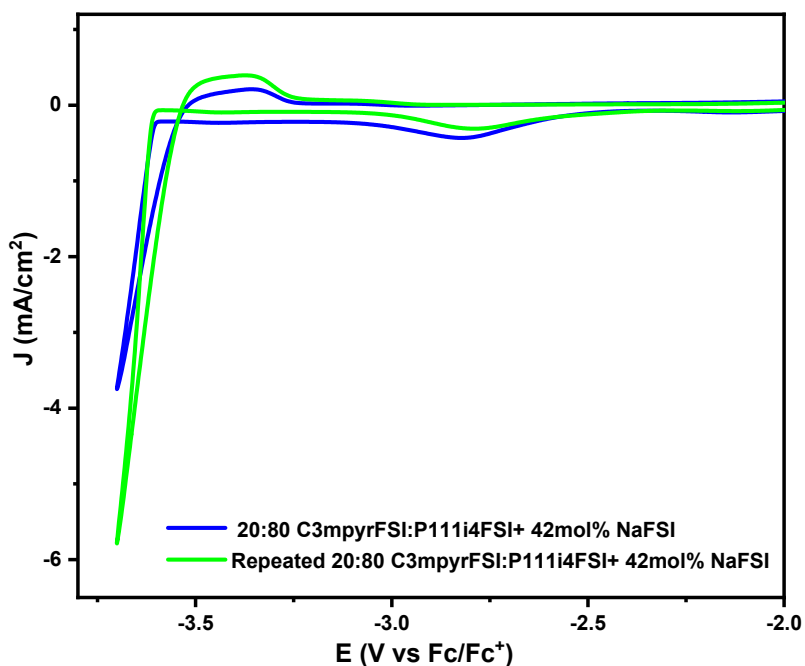

**Figure S5.** Cyclic voltammety curves for the repeated 20:80 C<sub>3</sub>mpyrFSI: P<sub>111i4</sub>FSI+ 42mol% NaFSI at 1<sup>st</sup> cycle.

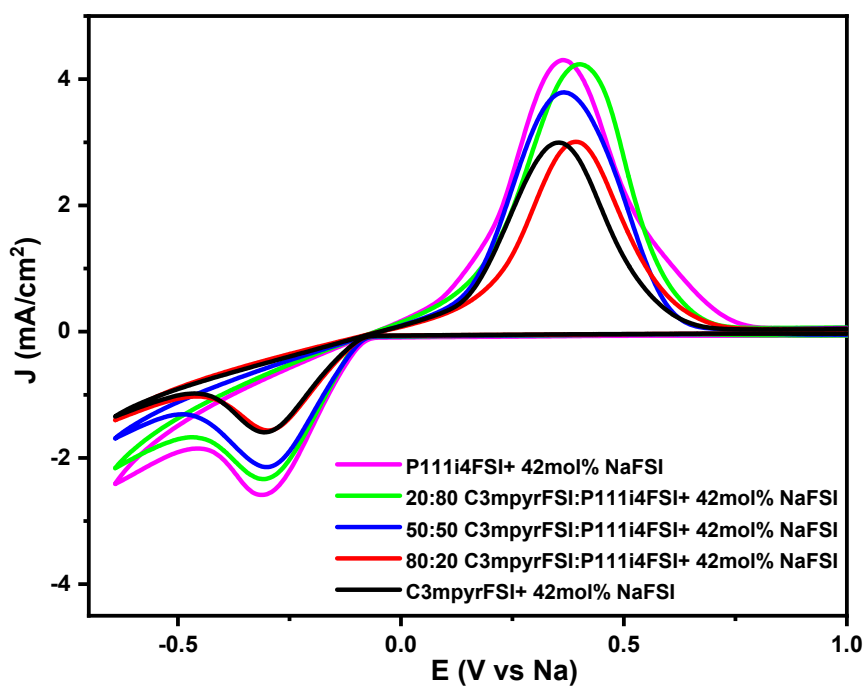

**Figure S6.** Cyclic voltammety curves for the mixed P<sub>111i4</sub>FSI and C<sub>3</sub>mpyrFSI with 42 mol% NaFSI system at 2<sup>nd</sup> cycle
